# Supplementary material for: Retinoic acid controls the homeostasis of pre-cDC–derived splenic and intestinal dendritic cells
Source: PubMed Central journal article supplement — J Exp Med. 2013 Sep 23;210(10):1961–76. doi: 10.1084/jem.20122508 (PMC3782040; doi:10.1084/jem.20122508), 2013-09-23
Supplement: supp_jem.20122508_JEM_20122508_sm.pdf [file supp_jem.20122508_JEM_20122508_sm.pdf]

SUPPLEMENTAL MATERIAL

Klebanoff et al., <http://www.jem.org/cgi/content/full/jem.20122508/DC1>

Table S1, included as a separate Excel file, shows differentially expressed genes in CD11b<sup>+</sup>CD8 $\alpha$ <sup>-</sup> and CD11b<sup>-</sup>CD8 $\alpha$ <sup>+</sup> cDC subsets reconstituted after TBI in the presence of RA or vehicle Ctrl.
